# Supplementary material
Source: PubMed Central journal article supplement (PMC4405154)
Supplement: NIHMS673974-supplement-01.pdf [file NIHMS673974-supplement-01.pdf]

504  
505**Table S1. Patients with AHI>10 during titration PSG**

| n                           | 74             |                |
|-----------------------------|----------------|----------------|
| sex                         | 70% male       |                |
| age                         | 58 (31, 90)    |                |
| BMI                         | 31 (28, 36)    |                |
| ESS                         | 7 (4, 12)      |                |
| Time between studies (days) | 92 (40, 212)   |                |
|                             | Dx             | PAP            |
| Subj Lat (min)              | 30 (15, 60)    | 30 (15, 60)    |
| Subj TST (min)              | 345 (240, 413) | 300 (240, 390) |
| Subj # wakes                | 3 (2, 4)       | 4 (2, 5)       |
| Subj WASO (min)             | 30 (13, 45)    | 23 (10, 60)    |
| S-O Lat (min)               | 13 (0, 29.4)   | 15 (1, 34)     |
| S-O TST (min)               | -32 (-83, 17)  | -12 (-78, 20)  |
| S-O # wakes                 | -22 (-36, -12) | -23 (-33, -13) |
| S-O WASO (min)              | -14 (-56, 1)   | -35 (-74, -9)  |
| TST (min)                   | 374 (330,409)  | 329 (278,386)  |
| Lat (min)                   | 4 (2,7)        | 4 (1,10)       |
| LPS (min)                   | 13 (3,29)      | 14 (4,30)      |
| REM Lat                     | 148 (86,254)   | 108 (61,210)   |
| N1%                         | 19 (12,25)     | 19 (9,27)      |
| N2%                         | 56 (50,64)     | 50 (41,61)     |
| N3%                         | 10 (5,17)      | 13 (6,22)      |
| R%                          | 12 (8,16)      | 12 (7,21)      |
| Eff (%)                     | 86 (79,92)     | 79 (68,87)     |
| #30sW                       | 25 (13,37)     | 26 (19,37)     |
| #60sW                       | 13 (7,20)      | 15 (8,22)      |
| Sp AI (hr <sup>-1</sup> )   | 3 (1,5)        | 4 (2,6)        |
| LMAI (hr <sup>-1</sup> )    | 1 (0,3)        | 2 (0,5)        |
| PLMI (hr <sup>-1</sup> )    | 4 (0,16)       | 7 (1,20)       |
| AHI (hr <sup>-1</sup> )     | 19 (11,32)     | 16 (12,24)     |
| AHI Supine                  | 27 (15,46)     | 19 (13,28)     |
| AHI REM                     | 23 (11,44)     | 6 (0, 20) *    |
| RDI (hr <sup>-1</sup> )     | 33 (25,51)     | 21 (16,30)     |
| O2 nadir REM                | 84 (78,89)     | 91 (86,93)     |
| O2 nadir NR                 | 85 (81,88)     | 86 (81,88)     |

506  
507  
508  
509  
510

The group with titration AHI>10 shown in Table S1 did not differ significantly in age, sex, BMI, ESS, or time between studies compared with the group with titration AHI <10 shown in Table 1 (ANOVA with Dunn's post-hoc test). The diagnostic PSG metrics did not differ significantly in

511 group comparisons between those with titration AHI <10 versus those with titration AHI >10,  
512 except for the AHI value (\*). Abbreviations are as in Table 1.  
513  
514
